# Supplementary material
Source: ML conference proceedings conference paper supplement (https://openaccess.thecvf.com/content/CVPR2026/html/Cai_Multi-Hierarchical_Contrastive_Spectral_CVPR_2026_paper.html)
Supplement: Supplementary file 1 [file Cai_Multi-Hierarchical_Contrastive_Spectral_CVPR_2026_supplemental.pdf]

# Multi-Hierarchical Contrastive Spectral Fusion for Multi-View Clustering

## Supplementary Material

### A. Theoretical Analysis

#### A1. Proof for Theorem 1

**Theorem 1.** *Minimizing the spectral loss  $\mathcal{L}_{\text{spc}}$  is equivalent to minimizing standard spectral embedding objective  $\sum_v \text{Tr}(\mathbf{P}^{(v)\top} \mathbf{L}^{(v)} \mathbf{P}^{(v)})$ .*

*Proof.* For each view  $v$ , the spectral loss is defined as:

$$\mathcal{L}_{\text{spc}} = \sum_{i,j} W_{ij}^{(v)} \|\mathbf{p}_i^{(v)} - \mathbf{p}_j^{(v)}\|^2, \quad (16)$$

where  $W_{ij}^{(v)}$  denotes the similarity between samples  $i$  and  $j$  in view  $v$ , and  $\mathbf{p}_i^{(v)}$  is the embedding of sample  $i$  in view  $v$ .

Let  $\mathbf{L}^{(v)} = \mathbf{D}^{(v)} - \mathbf{W}^{(v)}$  be the graph Laplacian for view  $v$ , where  $\mathbf{D}^{(v)}$  is the degree matrix. We have:

$$\begin{aligned} & \sum_{i,j} W_{ij}^{(v)} \|\mathbf{p}_i^{(v)} - \mathbf{p}_j^{(v)}\|^2 \\ &= \sum_{i,j} W_{ij}^{(v)} (\|\mathbf{p}_i^{(v)}\|^2 + \|\mathbf{p}_j^{(v)}\|^2 - 2\mathbf{p}_i^{(v)\top} \mathbf{p}_j^{(v)}) \\ &= 2 \sum_i D_{ii}^{(v)} \|\mathbf{p}_i^{(v)}\|^2 - 2 \sum_{i,j} W_{ij}^{(v)} \mathbf{p}_i^{(v)\top} \mathbf{p}_j^{(v)} \\ &= 2 \cdot \text{Tr}(\mathbf{P}^{(v)\top} \mathbf{L}^{(v)} \mathbf{P}^{(v)}). \end{aligned} \quad (17)$$

Thus, minimizing  $\mathcal{L}_{\text{spc}}$  is equivalent to minimizing  $\sum_v \text{Tr}(\mathbf{P}^{(v)\top} \mathbf{L}^{(v)} \mathbf{P}^{(v)})$ , which is the standard objective of spectral embedding. This ensures that samples connected with high similarity ( $W_{ij}^{(v)}$ ) remain close in the embedding space  $\mathbf{P}^{(v)}$ , preserving the local geometric structure.  $\square$

#### A2. Proof that MCSF Satisfies Definition 1

**Definition 1. (Deep Spectral Embedding)** *Given a graph Laplacian  $\mathbf{L} \in \mathbb{R}^{n \times n}$ , A representation  $\mathbf{P}^{(v)} \in \mathbb{R}^{n \times K}$  learned via a neural network is a deep spectral embedding if it satisfies:*

1. *Clustering structure preservation:  $\mathbf{P}^{(v)}$  minimizes the Laplacian objective:  $\text{Tr}(\mathbf{P}^{(v)\top} \mathbf{L}^{(v)} \mathbf{P}^{(v)})$ ;*
2. *Orthonormality:  $\mathbf{P}^{(v)\top} \mathbf{P}^{(v)} = \mathbf{I}$ ;*
3. *End-to-end trainability:  $\mathbf{P}^{(v)}$  is differentiable with respect to the network parameters.*

*Proof.* Without loss of generality, we consider an arbitrary view for the proof.

**(1) Structure Preservation.** The spectral loss in MCSF is defined as:

$$\mathcal{L}_{\text{spc}} = \sum_{i,j} W_{ij} \|\mathbf{p}_i - \mathbf{p}_j\|^2. \quad (18)$$

According to Theorem 1,  $\mathcal{L}_{\text{spc}}$  is equivalent (up to a scalar) to the classical spectral embedding objective  $\text{Tr}(\mathbf{P}^\top \mathbf{L} \mathbf{P})$ .

**(2) Orthonormality Constraint.** Let  $\mathbf{H} \in \mathbb{R}^{n \times K}$  denote the probability matrix. To ensure numerical stability, we compute the matrix:

$$\mathbf{R} = \text{chol}(\mathbf{H}^\top \mathbf{H} + \epsilon \mathbf{I}), \quad (19)$$

where  $\epsilon > 0$  is a small constant (e.g.,  $10^{-5}$ ) and  $\text{chol}(\cdot)$  denotes the Cholesky decomposition, which returns a lower triangular matrix  $\mathbf{R}$  such that:

$$\mathbf{H}^\top \mathbf{H} + \epsilon \mathbf{I} = \mathbf{R} \mathbf{R}^\top. \quad (20)$$

The final embedding is then obtained as:

$$\mathbf{P} = \mathbf{H}(\mathbf{R}^{-1})^\top. \quad (21)$$

We now analyze the orthogonality of  $\mathbf{P}$ :

$$\begin{aligned} \mathbf{P}^\top \mathbf{P} &= (\mathbf{R}^{-1}) \mathbf{H}^\top \mathbf{H} (\mathbf{R}^{-1})^\top \\ &= (\mathbf{R}^{-1}) (\mathbf{R} \mathbf{R}^\top - \epsilon \mathbf{I}) (\mathbf{R}^{-1})^\top \\ &= (\mathbf{R}^{-1}) \mathbf{R} \mathbf{R}^\top (\mathbf{R}^{-1})^\top - \epsilon (\mathbf{R}^{-1}) (\mathbf{R}^{-1})^\top \\ &= \mathbf{I} - \epsilon (\mathbf{R}^{-1}) (\mathbf{R}^{-1})^\top. \end{aligned} \quad (22)$$

Let  $\mathbf{M} = \mathbf{R}^{-1}$ . Since  $\mathbf{R}$  is a lower triangular matrix,  $\mathbf{M}$  is also lower triangular, and  $\mathbf{M} \mathbf{M}^\top$  is a symmetric positive definite matrix. Therefore,

$$\mathbf{P}^\top \mathbf{P} = \mathbf{I} - \epsilon \mathbf{M} \mathbf{M}^\top \approx \mathbf{I}. \quad (23)$$

#### Interpretation and Practical Considerations:

- The embedding  $\mathbf{P}$  is not strictly orthogonal but approximately orthogonal. The deviation from orthogonality is controlled by the term  $\epsilon \mathbf{M} \mathbf{M}^\top$ .
- In practice,  $\epsilon$  is chosen to be very small (e.g.,  $10^{-5}$  or  $10^{-8}$ ) to ensure numerical stability during Cholesky decomposition without significantly violating the orthogonality constraint.
- This approximation is widely adopted in deep learning frameworks [5, 6, 10] to enforce differentiable constraints and has proven effective in practice.

Thus, for practical purposes,  $\mathbf{P}$  satisfies the orthonormality constraint sufficiently well.

**(3) End-to-End Learnability.** The structure-preserving spectral loss for each view  $v$  in MCSF is defined as:

$$\mathcal{L}_{\text{spc}} = \sum_{i,j=1}^n W_{ij} \|\mathbf{p}_i - \mathbf{p}_j\|^2 = 2 \text{Tr}(\mathbf{P}^\top \mathbf{L} \mathbf{P}). \quad (24)$$

**Gradient Derivation** According to matrix calculus, we have:

$$\frac{\partial}{\partial \mathbf{P}} 2 \text{Tr}(\mathbf{P}^\top \mathbf{L} \mathbf{P}) = 4 \mathbf{L} \mathbf{P}. \quad (25)$$

Therefore, the gradient of the spectral loss with respect to  $\mathbf{P}$  is:

$$\frac{\partial \mathcal{L}_{\text{spc}}}{\partial \mathbf{P}} = 4 \mathbf{L} \mathbf{P}. \quad (26)$$

**Differentiability and Backpropagation** Modern automatic differentiation frameworks (*e.g.*, PyTorch) support backpropagation through Cholesky decomposition and related matrix operations [9]. Since  $\mathbf{P}$  is constructed via differentiable operations (matrix multiplication, inversion, and Cholesky decomposition), and  $\mathbf{W}$  is computed from encoder features using differentiable kernels (*e.g.*, Gaussian or cosine), the entire spectral loss  $\mathcal{L}_{\text{spc}}$  remains differentiable with respect to the encoder parameters. Thus, gradients  $\nabla \mathcal{L}_{\text{spc}}$  can be efficiently computed and propagated during training.  $\square$

### A3. Proof for Theorem 2

**Theorem 2.** *Minimizing the multi-hierarchical contrastive loss  $\mathcal{L}_c$  simultaneously maximizes the following:*

$$I(\mathbf{P}^{(v)}; \mathbf{P}^{(v)}) + I(\mathbf{P}^{(v)}; \mathbf{P}) + I(\mathbf{P}; \mathbf{P}), \quad (27)$$

where  $I(\mathbf{P}^{(v)}; \mathbf{P}^{(v)})$ ,  $I(\mathbf{P}^{(v)}; \mathbf{P})$ , and  $I(\mathbf{P}; \mathbf{P})$  correspond to the mutual information for VSP, VCA, and CSR, respectively.

*Proof.* By applying Lemma 1 to each component of  $\mathcal{L}_c$  in Eq. (10), we have: For VSP:  $\mathcal{L}_{VSP} \geq C_1 - I(\mathbf{P}^{(v)}; \mathbf{P}^{(v)})$ ; For VCA:  $\mathcal{L}_{VCA} \geq C_2 - I(\mathbf{P}^{(v)}; \mathbf{P})$ ; For CSR:  $\mathcal{L}_{CSR} \geq C_3 - I(\mathbf{P}; \mathbf{P})$ . Combining these inequalities, we obtain:

$$\begin{aligned} \mathcal{L}_c &\geq (C_1 + C_2 + C_3) \\ &\quad - \left( I(\mathbf{P}^{(v)}; \mathbf{P}^{(v)}) + I(\mathbf{P}^{(v)}; \mathbf{P}) + I(\mathbf{P}; \mathbf{P}) \right). \end{aligned} \quad (28)$$

Thus, minimizing  $\mathcal{L}_c$  maximizes the sum of the mutual information terms, proving the theorem.  $\square$

### A4. Proof for Theorem 3

**Theorem 3.** *Under the multi-hierarchical semantic consistency condition, the mutual information between the consensus representation  $\mathbf{P}$  and the ground-truth labels  $\mathbf{Y}$  is lower-bounded by the maximum mutual information achieved by any single view.*

$$I(\mathbf{P}; \mathbf{Y}) \geq \max_v I(\mathbf{P}^{(v)}; \mathbf{Y}) - \epsilon, \quad (29)$$

where  $\epsilon \geq 0$  is a small constant representing the residual inconsistency across views.

*Proof.* From the data processing inequality, we have for any view  $v$ :

$$I(\mathbf{P}^{(v)}; \mathbf{Y}) \leq I(\mathbf{P}^{(v)}; \mathbf{P}; \mathbf{Y}) + I(\mathbf{P}^{(v)}; \mathbf{Y} | \mathbf{P}). \quad (30)$$

The consensus representation  $\mathbf{P}$  is constructed by aggregating information from all view-specific representations  $\{\mathbf{P}^{(v)}\}$ . Under the multi-hierarchical semantic consistency condition: VCA ensures that  $I(\mathbf{P}^{(v)}; \mathbf{P})$  is high, meaning  $\mathbf{P}$  captures the information from each  $\mathbf{P}^{(v)}$ ; CSR ensures that  $I(\mathbf{P}; \mathbf{Y})$  is high, meaning  $\mathbf{P}$  itself is discriminative.

Therefore, the conditional mutual information  $I(\mathbf{P}^{(v)}; \mathbf{Y} | \mathbf{P})$  is small, as most information about  $\mathbf{Y}$  in  $\mathbf{P}^{(v)}$  is already captured in  $\mathbf{P}$ . This implies:

$$I(\mathbf{P}^{(v)}; \mathbf{Y}) \lesssim I(\mathbf{P}; \mathbf{Y}). \quad (31)$$

Taking the maximum over  $v$  on the left side of the inequality (31) and accounting for potential information loss during fusion (bounded by  $\epsilon$ ), we obtain the final result:

$$I(\mathbf{P}; \mathbf{Y}) \geq \max_v I(\mathbf{P}^{(v)}; \mathbf{Y}) - \epsilon. \quad (32)$$

$\square$

### A5. Complexity Analysis

We analyze the computational complexity of MCSF and compare it with conventional deep spectral clustering frameworks such as MvSCN [5], which rely on Siamese architectures. The analysis assumes mini-batch training, where  $n$  is the total number of samples and  $b$  is the batch size. The complexity of MCSF arises primarily from three components: (1) view-specific encoder-decoder networks, (2) spectral embedding with Cholesky orthogonalization, and (3) multi-hierarchical contrastive learning.

For each view, the encoder-decoder module has a complexity of  $\mathcal{O}(b \sum d_i d_j)$ , leading to a total of  $\mathcal{O}(Vb \sum d_i d_j)$  across all  $V$  views. The batch-wise spectral embedding computation and Cholesky decomposition involve computing similarity graphs ( $\mathcal{O}(Vb^2 d)$ ), orthogonalization ( $\mathcal{O}(VK^3 + VbK^2)$ ), and contrastive loss over pairwise similarities ( $\mathcal{O}(Vb^2 d + Vb^2)$ ). As a result, the per-epoch complexity of MCSF is:

$$\mathcal{O}\left(\frac{n}{b} \cdot V \cdot \left(2b^2 d + b^2 + K^3 + bK^2 + b \sum d_i d_j\right)\right). \quad (33)$$

Compared to frameworks that employ Siamese architectures for deep spectral embedding, MCSF significantly reduces computational overhead by eliminating redundant dual-branch encoders. For example, in MvSCN, each sample requires two forward passes through identical encoders, resulting in an additional complexity of  $\mathcal{O}(2bF)$ , where  $F$  denotes the cost of a single forward pass. In contrast, MCSF performs only a single pass per sample, reducing the feature

---

**Algorithm 1:** MCSF

---

**Input:** Multi-view data  $\{\mathbf{X}^{(v)}\}_{v=1}^V$ , cluster number  $K$ , hyperparameters  $\alpha, \beta$ , neighborhood size  $k$ , batch size  $b$ ; maximum epochs  $T$

**Output:** Cluster labels

```
1 Initialize networks  $\{h_\theta^{(v)}, h_\delta^{(v)}\}_{v=1}^V$ ;
2 for epoch = 1 to T do
3   foreach batch in dataloader do
4     for v = 1 to V do
5       Encoder:  $\mathbf{Z}^{(v)} \leftarrow h_\theta^{(v)}(\mathbf{X}^{(v)})$ ;
6       Decoder:  $\hat{\mathbf{X}}^{(v)} \leftarrow h_\delta^{(v)}(\mathbf{Z}^{(v)})$ ;
7       Cluster probabilities:
8          $\mathbf{H}^{(v)} \leftarrow \text{softmax}(g_\psi(\mathbf{Z}^{(v)}))$ ;
9         Orthogonal embedding:  $\mathbf{P}^{(v)} \leftarrow$ 
10           $\mathbf{H}^{(v)}(\text{chol}((\mathbf{H}^{(v)})^\top \mathbf{H}^{(v)} + \varepsilon \mathbf{I}))^{-1}$ ;
11          Compute similarity  $\mathbf{W}^{(v)}$  via Eq. (1);
12        end
13        Initialize consensus representation:
14         $\mathbf{P} \leftarrow \frac{1}{V} \sum_{v=1}^V \mathbf{P}^{(v)}$ ;
15        Compute  $\mathcal{L}_{\text{re}}$  via Eq. (14);
16        Compute  $\mathcal{L}_{\text{spc}}$  via Eq. (4);
17        Compute  $\mathcal{L}_c$  via Eq. (10);
18        Total loss:  $\mathcal{L} \leftarrow \mathcal{L}_{\text{re}} + \alpha \mathcal{L}_{\text{spc}} + \beta \mathcal{L}_c$ ;
19        Update parameters via backpropagation;
20      end
21    end
22  end
23  Initialize  $k$ -means to  $\mathbf{P}$  to obtain cluster labels.
```

---

extraction cost to  $\mathcal{O}(bF)$ . This design achieves approximately a twofold reduction in encoder-related computation per batch, enabling more efficient training without sacrificing clustering performance.

## B. Experimental Details

### B1. Algorithmic Procedure

The complete procedure of MCSF is summarized in Algorithm 1.

### B2. Datasets

We evaluate MCSF on eight widely-used multi-view datasets that cover a range of domains, including text, objects, digits, and faces. 3Sources [12]: A text classification dataset containing 169 news articles from three sources, *i.e.*, BBC, Reuters, and The Guardian. MSRC-v1 [13]: An object recognition dataset with 210 images from 7 categories, each described by 5 visual feature representations. COIL-20 [8]: A classic multi-view object dataset comprising 1440 grayscale images of 20 objects, with three views extracted using different visual descriptors. Extended YaleB [4]: A

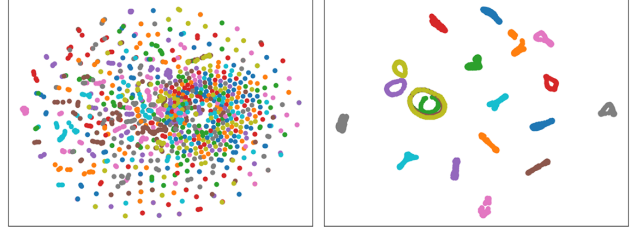

Figure 7. Visualization of the representation matrix ( $\mathbf{Z}^{(1)}$ ) on COIL-20 without (left) and with (right) spectral embedding loss ( $\mathcal{L}_{\text{spc}}$ ). Different colors denote different clusters.

Table 4. Batch size configurations on different datasets.

| Datasets | $b_1$ | $b_2$ | $b_3$ | $b_4$ | $b_5$ | $b_6$ |
|----------|-------|-------|-------|-------|-------|-------|
| EYaleB   | 64    | 80    | 128   | 160   | 320   | 640   |
| COIL-20  | 48    | 144   | 240   | 480   | 720   | 1440  |
| NUS-WIDE | 50    | 100   | 200   | 400   | 800   | 1600  |
| Hdigit   | 100   | 200   | 500   | 1000  | 2000  | 5000  |

face dataset with 640 images of 10 individuals captured under varying illumination conditions. MNIST-USPS [1]: A digit dataset combining the MNIST and USPS datasets, where each sample is converted into a 768-dimensional vector, consisting of 5000 samples and 10 clusters. Hdigit [2]: A large-scale handwritten digit dataset containing 10,000 samples. It provides two distinct feature views with dimensions 784 and 256, respectively. NUS-WIDE [3]: A subset of the real-world web image dataset containing 1600 images from 8 categories, described by six heterogeneous visual feature views. Cifar100 [7]: A dataset for object recognition consisting of 50,000 samples, 100 clusters, and 3 views.

## C. Additional Experiments

### C1. Experiments on Spectral Embedding Loss

In addition to the quantitative results, we further visualize the representation matrices learned with and without the spectral embedding loss ( $\mathcal{L}_{\text{spc}}$ ) using t-SNE [11] on the COIL-20 dataset, as shown in Figure 7. When  $\mathcal{L}_{\text{spc}}$  is removed (left), the learned representations are poorly separated and heavily entangled, leading to ambiguous cluster boundaries. In contrast, when  $\mathcal{L}_{\text{spc}}$  is incorporated (right), the resulting representations exhibit well-separated and compact clusters, aligning with class semantics. This visual evidence reinforces the numerical findings in Table 1, particularly the substantial improvement on COIL-20 (from 56.46% to 84.86%) when adding  $\mathcal{L}_{\text{spc}}$  to a model trained only with contrastive loss. It demonstrates that spectral embedding loss plays a critical role in uncovering the intrinsic geometric structure, thus enhancing inter-cluster separability and facilitating more effective clustering.

## C2. Batch Size Configurations

The details of the batch size configurations corresponding to Figure 6 in the main paper are provided in Table 4.

## References

- [1] Arthur Asuncion, David Newman, et al. UCI machine learning repository, 2007. 3
- [2] Man-Sheng Chen, Chang-Dong Wang, and Jian-Huang Lai. Low-rank tensor based proximity learning for multi-view clustering. *IEEE Trans. Knowl. Data Eng.*, 2022. 3
- [3] Tat-Seng Chua, Jinhui Tang, Richang Hong, Haojie Li, Zhiping Luo, and Yantao Zheng. NUS-WIDE: a real-world web image database from National University of Singapore. In *ACM Int. Conf. Image Video Retr.*, pages 1–9, 2009. 3
- [4] Athinodoros S. Georghiades, Peter N. Belhumeur, and David J. Kriegman. From few to many: Illumination cone models for face recognition under variable lighting and pose. *IEEE Trans. Pattern Anal. Mach. Intell.*, 23(6):643–660, 2001. 3
- [5] Zhenyu Huang, Joey Tianyi Zhou, Xi Peng, Changqing Zhang, Hongyuan Zhu, and Jiancheng Lv. Multi-view spectral clustering network. In *Int. Joint Conf. Artif. Intell.*, page 4, 2019. 1, 2
- [6] Zhenyu Huang, Joey Tianyi Zhou, Hongyuan Zhu, Changqing Zhang, Jiancheng Lv, and Xi Peng. Deep spectral representation learning from multi-view data. *IEEE Trans. Image Process.*, 30:5352–5362, 2021. 1
- [7] Alex Krizhevsky, Geoffrey Hinton, et al. Learning multiple layers of features from tiny images. 2009. 3
- [8] Sameer A Nene, Shree K Nayar, Hiroshi Murase, et al. Columbia object image library (COIL-20). 1996. 3
- [9] Adam Paszke, Sam Gross, Soumith Chintala, Gregory Chanan, Edward Yang, Zachary DeVito, Zeming Lin, Alban Desmaison, Luca Antiga, and Adam Lerer. Automatic differentiation in PyTorch. 2017. 2
- [10] Uri Shaham, Kelly Stanton, Henry Li, Boaz Nadler, Ronen Basri, and Yuval Kluger. Spectralnet: Spectral clustering using deep neural networks. In *Int. Conf. Learn. Represent.*, 2018. 1
- [11] Laurens Van der Maaten and Geoffrey Hinton. Visualizing data using t-SNE. *J. Mach. Learn. Res.*, 9(11), 2008. 3
- [12] Liang Yao and Gui-Fu Lu. Double structure scaled simplex representation for multi-view subspace clustering. *Neural Netw.*, 151:168–177, 2022. 3
- [13] Pei Zhang, Xinwang Liu, Jian Xiong, Sihang Zhou, Wentao Zhao, En Zhu, and Zhiping Cai. Consensus one-step multi-view subspace clustering. *IEEE Trans. Knowl. Data Eng.*, 34(10):4676–4689, 2020. 3
